# Supplementary material for: Supplementation of Diets With Spirulina Influences Immune and Gut Function in Dogs
Source: Frontiers journal article supplement (doi:10.3389/fnut.2021.667072), 2021-05-28
Supplement: Data_Sheet_1.pdf [file Data_Sheet_1.pdf]

## Supplementary Tables

***Table 1:* Control Diet Composition**

| Proximates    | %    |
|---------------|------|
| Protein       | 29   |
| Carbohydrates | 36.1 |
| Fat           | 19   |
| mouisture     | 8    |
| Ash           | 6.5  |
| Crude Fiber   | 1.4  |
| Total         | 100  |

**Table 2 Fecal Quality:** Fecal quality was recorded daily during the trial using a seven-point scale with a Score of 1 representing firm, hard feces and a Score of 7 representing liquid diarrhea. On this scale scores of 2 or 3 are ideal.

| <b>Fecal Quality Scoring System</b> |                                                                                                                                             |
|-------------------------------------|---------------------------------------------------------------------------------------------------------------------------------------------|
| <b>Score</b>                        | <b>Description of Feces</b>                                                                                                                 |
| 1                                   | Very hard and dry; requires much effort to expel from body; no residue left on ground when picked up. Often expelled as individual pellets. |
| 2                                   | Firm, but not hard; should be pliable; segmented appearance; little or no residue left on ground when picked up.                            |
| 3                                   | Log-like; little or no segmentation visible; moist surface; leaves residue but holds form when picked up.                                   |
| 4                                   | Very moist (soggy); distinct log shape visible; leaves residue and loses form when picked up.                                               |
| 5                                   | Very moist but has distinct shape; present in piles rather than as distinct logs; leaves residue and loses form when picked up.             |
| 6                                   | Has texture, but no defined shape; occurs as piles or as spots; leaves residue when picked up.                                              |
| 7                                   | Watery, no texture, flat; occurs as puddles.                                                                                                |

**Table 3: Similarity Scores:** TTGE microbial profile similarity scores of gut microflora before and after exercise in the *Spirulina* supplemented group and the control group.

| <b><i>Spirulina</i> Supplemented Group</b> |                            | <b>Control Group</b> |                            |
|--------------------------------------------|----------------------------|----------------------|----------------------------|
| <b>Dog ID</b>                              | <b>Pre vs. 24 hrs Post</b> | <b>Dog ID</b>        | <b>Pre vs. 24 hrs Post</b> |
| Kona                                       | 70                         | Fire                 | 50.7                       |
| Maui                                       | 85                         | Austin               | 47.3                       |
| Sara                                       | 83.2                       | Savannah             | 54.2                       |
| Dover                                      | 87                         | Aggie                | 47.32                      |
| Banshee                                    | 82                         | Hollywood            | 45                         |
| Flo                                        | 83.4                       | Phoenix              | 47                         |
| Elan                                       | 73.4                       | Nullah               | 37.8                       |
| Salomon                                    | 80.8                       | Dyna                 | 50.7                       |
| Atomic                                     | 77.3                       | Jones                | 33.2                       |
| Bo                                         | 79.9                       | Deigo                | 54.6                       |
| Don                                        | 80.4                       | Sparrow              | 47.4                       |
| Tia                                        | 55.31                      | Rondy                | 40.1                       |
| Tozier                                     | 82.3                       | Cordova              | 46.9                       |
| Scarlett                                   | 83.7                       | Muldoon              | 85                         |
| Lena                                       | 63.24                      | Laz                  | 41.2                       |
